# Supplementary material for: Microbial Life in a Fjord: Metagenomic Analysis of a Microbial Mat in Chilean Patagonia
Source: PubMed Central journal article supplement (PMC3756073; doi:10.1371/journal.pone.0071952), 2013-08-28

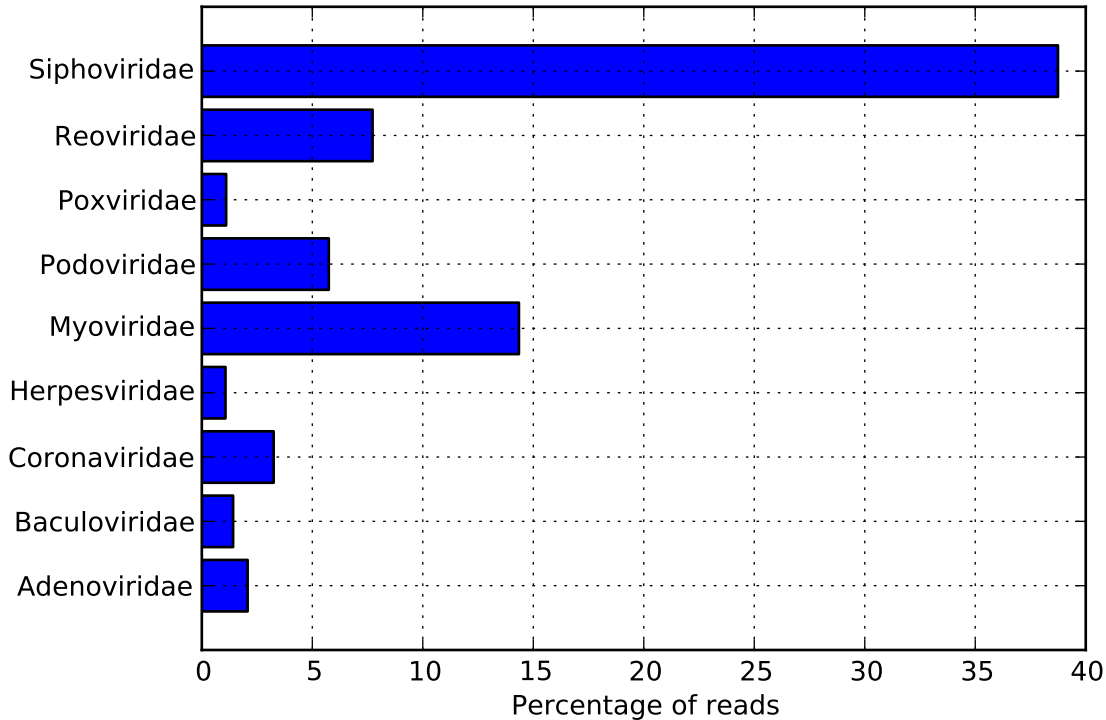

Supplement: pone.0071952.s001.pdf [file pone.0071952.s001.pdf]
