# Supplementary material for: Microbial Life in a Fjord: Metagenomic Analysis of a Microbial Mat in Chilean Patagonia
Source: PubMed Central journal article supplement (PMC3756073; doi:10.1371/journal.pone.0071952), 2013-08-28
Supplement: pone.0071952.s008.pdf [file pone.0071952.s008.pdf]

**Supplementary Table 1.** Nutrient analysis from water samples, October 2012.

|                   |           |
|-------------------|-----------|
| NO <sub>3</sub>   | 8.58 μM   |
| NO <sub>2</sub>   | 0.24 μM   |
| PO <sub>4</sub>   | 1.02 μM   |
| NH <sub>4</sub>   | 2.40 μM   |
| SiO <sub>2</sub>  | 17.67 μM  |
| pH                | 8.49      |
| ΣH <sub>2</sub> S | 116.11 μM |
| CH <sub>4</sub>   | 0.26      |
