# Supplementary material for: Microbial Life in a Fjord: Metagenomic Analysis of a Microbial Mat in Chilean Patagonia
Source: PubMed Central journal article supplement (PMC3756073; doi:10.1371/journal.pone.0071952), 2013-08-28
Supplement: pone.0071952.s009.pdf [file pone.0071952.s009.pdf]

## Supplementary Table 2. Assembly statistics

|                                   |             |
|-----------------------------------|-------------|
| <b>Aligned bases</b>              | 101,071,017 |
| <b>Number of contigs</b>          | 13,513      |
| <b>Number of bases in contigs</b> | 20,099,859  |
|                                   |             |
| <b>Average contig size</b>        | 1,487       |
| <b>N50 Contigs</b>                | 1,654       |
| <b>Largest contig</b>             | 39,478      |
| <b>Total contigs</b>              | 19,431      |
|                                   |             |
| <b>Singletons</b>                 | 689,455     |
