# Supplementary material for: Microbial Life in a Fjord: Metagenomic Analysis of a Microbial Mat in Chilean Patagonia
Source: PubMed Central journal article supplement (PMC3756073; doi:10.1371/journal.pone.0071952), 2013-08-28
Supplement: pone.0071952.s010.pdf [file pone.0071952.s010.pdf]

**Supplementary Table 3.** Classification of 16S rRNA reads with Greengenes

| <b>Kingdom</b> | <b>Phylum</b>          | <b>Class</b>                 | <b>16S count</b> |
|----------------|------------------------|------------------------------|------------------|
| Bacteria       | <i>Actinobacteria</i>  | <i>Actinobacteria</i>        | 2                |
|                | <i>Bacteroidetes</i>   | <i>Caldithrixae</i>          | 1                |
|                |                        | <i>Flavobacteria</i>         | 288              |
|                |                        | <i>Sphingobacteria</i>       | 16               |
|                |                        | <i>Bacteroidia</i>           | 87               |
|                | <i>Chloroflexi</i>     | <i>Anaerolineae</i>          | 3                |
|                | <i>Firmicutes</i>      | <i>Mollicutes</i>            | 1                |
|                |                        | <i>Erysipelotrichi</i>       | 3                |
|                |                        | <i>Clostridia</i>            | 9                |
|                |                        | <i>Bacilli</i>               | 4                |
|                | <i>Lentisphaerae</i>   | <i>Lentisphaerae</i>         | 3                |
|                | <i>Planctomycetes</i>  | <i>Phycisphaerae</i>         | 1                |
|                | <i>Proteobacteria</i>  | <i>Alphaproteobacteria</i>   | 19               |
|                |                        | <i>Betaproteobacteria</i>    | 1                |
|                |                        | <i>Deltaproteobacteria</i>   | 35               |
|                |                        | <i>Gammaproteobacteria</i>   | 1221             |
|                |                        | <i>Epsilonproteobacteria</i> | 162              |
|                | <i>Spirochaetae</i>    | <i>Spirochaetes</i>          | 1                |
| Archaea        | <i>Thaumarchaeota</i>  | <i>Thaumarchaeota</i>        | 1                |
|                | <i>Verrucomicrobia</i> | <i>Verrucomicrobiae</i>      | 1                |
|                |                        | <i>Spartobacteria</i>        | 1                |
| Unclassified   |                        |                              | 9                |
