# Supplementary material for: Microbial Life in a Fjord: Metagenomic Analysis of a Microbial Mat in Chilean Patagonia
Source: PubMed Central journal article supplement (PMC3756073; doi:10.1371/journal.pone.0071952), 2013-08-28
Supplement: pone.0071952.s011.pdf [file pone.0071952.s011.pdf]

**Supp. Table 4.** Classification of all the metagenomic reads using MGTAXA

| <b>Kingdom</b> | <b>Phylum</b>         | <b>Class</b>               | <b>Percentage of reads</b> |
|----------------|-----------------------|----------------------------|----------------------------|
| Bacteria       | <i>Actinobacteria</i> | <i>Actinobacteria</i>      | 1                          |
|                | <i>Bacteroidetes</i>  | <i>Bacteroidia</i>         | 1                          |
|                | <i>Cyanobacteria</i>  |                            | 1                          |
|                | <i>Firmicutes</i>     | <i>Bacili</i>              | 13                         |
|                |                       | <i>Clostridia</i>          | 3                          |
|                |                       | Other                      | 1                          |
|                | <i>Proteobacteria</i> | <i>Alphaproteobacteria</i> | 3                          |
|                |                       | <i>Betaproteobacteria</i>  | 2                          |
|                |                       | <i>Delta/epsilon</i>       | 3                          |
|                |                       | <i>Gammaproteobacteria</i> | 39                         |
|                | Other                 |                            | 5                          |
| Archaea        |                       |                            | 1                          |
| Eukaryote      |                       |                            | 2                          |
| Viruses        |                       |                            | 14                         |
